# Supplementary material
Source: PubMed Central journal article supplement (PMC5741184)
Supplement: NIHMS889478-supplement-Supplemental_PDF.pdf [file NIHMS889478-supplement-Supplemental_PDF.pdf]

## SUPPLEMENTAL MATERIAL

### SUPPLEMENTAL TABLES

Supplemental Table 1: Perioperative outcomes stratified by STAT categories

|                                                           | STAT Mortality Category |                    |                    |                     | P       |
|-----------------------------------------------------------|-------------------------|--------------------|--------------------|---------------------|---------|
|                                                           | 1                       | 2                  | 3                  | 4/5                 |         |
| In-hospital mortality                                     | 0.2% (14)               | 0.6% (43)          | 1.5% (24)          | 3.2% (84)           | <0.0001 |
| Operative mortality                                       | 0.3% (18)               | 0.7% (49)          | 1.6% (25)          | 3.3% (88)           | <0.0001 |
| Cardiopulmonary bypass time (minutes)                     | 70 (IQR: 49-99)         | 110 (IQR: 74-162)  | 122 (IQR: 80-192)  | 154 (IQR: 108-218)  | <0.0001 |
| Operating room time (hours)                               | 4.7 (IQR: 3.5-5.9)      | 5.9 (IQR: 4.5-7.5) | 6.9 (IQR: 5.6-8.9) | 7.5 (IQR: 5.7-9.7)  | <0.0001 |
| Length of stay (days)                                     | 4.0 (IQR: 3.0-5.0)      | 5.0 (IQR: 3.0-6.0) | 5.0 (IQR: 4.0-7.0) | 9.0 (IQR: 5.0-15.0) | <0.0001 |
| Major complication                                        | 3.1% (222)              | 6.1% (427)         | 7.6% (122)         | 14.9% (395)         | <0.0001 |
| <i>Arrhythmia requiring pacemaker</i>                     | 0.8% (47)               | 1.9% (116)         | 1.3% (19)          | 3.4% (83)           | <0.0001 |
| <i>New mechanical circulatory support</i>                 | 0.3% (16)               | 0.6% (38)          | 1.4% (20)          | 2.8% (69)           | <0.0001 |
| <i>Renal failure requiring permanent dialysis</i>         | 0.1% (5)                | 0.1% (8)           | 0.3% (5)           | 1.0% (24)           | <0.0001 |
| <i>Renal failure requiring temporary dialysis</i>         | 0.0% (1)                | 0.3% (16)          | 0.6% (9)           | 1.3% (33)           | <0.0001 |
| <i>Neurological deficit at discharge</i>                  | 0.2% (12)               | 0.5% (33)          | 0.8% (11)          | 1.8% (44)           | <0.0001 |
| <i>Phrenic nerve injury or diaphragm hemiparesis</i>      | 0.1% (7)                | 0.3% (18)          | 0.7% (10)          | 0.6% (15)           | <0.0001 |
| <i>Reoperation for bleeding</i>                           | 1.3% (78)               | 1.8% (110)         | 3.0% (44)          | 4.9% (120)          | <0.0001 |
| <i>Unplanned cardiac operation</i>                        | 0.9% (62)               | 1.7% (115)         | 2.0% (32)          | 3.4% (91)           | <0.0001 |
| <i>Unplanned interventional catheterization procedure</i> | 0.2% (11)               | 0.5% (38)          | 1.0% (16)          | 2.0% (54)           | <0.0001 |
| <i>Unplanned non-cardiovascular procedure</i>             | 0.3% (20)               | 0.8% (56)          | 0.9% (15)          | 2.7% (71)           | <0.0001 |
| Composite outcome                                         | 5.4% (383)              | 9.5% (660)         | 14.7% (236)        | 34.2% (906)         | <0.0001 |
| Prolonged length of stay                                  | 2.0% (145)              | 4.5% (313)         | 10.0% (161)        | 27.5% (728)         | <0.0001 |
| Wound infection or dehiscence                             | 66 (0.9%)               | 72 (1.0%)          | 21 (1.3%)          | 53 (2.0%)           | 0.0001  |

**Supplemental Table 2: Multivariate model of operative mortality with BMI modeled as a continuous variable**

| <i>Risk Factor</i>                                               | <i>Unadjusted</i>       |             | <i>Adjusted</i>         |             |
|------------------------------------------------------------------|-------------------------|-------------|-------------------------|-------------|
|                                                                  | <i>OR (95% CI)</i>      | <i>p</i>    | <i>OR (95% CI)</i>      | <i>p</i>    |
| <b>CDC BMI (per 10% increase)</b>                                | <b>0.98 (0.94,1.03)</b> | <b>0.40</b> | <b>1.00 (0.96,1.04)</b> | <b>0.95</b> |
| Age (per 5 years)                                                |                         |             | 1.13 (1.00,1.29)        | 0.06        |
| Female sex                                                       |                         |             | 0.93 (0.68,1.27)        | 0.65        |
| Race                                                             |                         |             |                         |             |
| White                                                            |                         |             | 1                       | n/a         |
| Black                                                            |                         |             | 1.40 (0.93,2.10)        | 0.11        |
| Other                                                            |                         |             | 0.93 (0.61,1.41)        | 0.74        |
| Previous cardiothoracic operations                               |                         |             | 1.50 (1.06,2.13)        | 0.02        |
| Presence of non-cardiac anatomic abnormalities                   |                         |             | 1.53 (0.63,3.71)        | 0.34        |
| Presence of Syndromes/chromosomal abnormalities                  |                         |             | 1.42 (0.96,2.10)        | 0.08        |
| STAT mortality category                                          |                         |             |                         |             |
| STAT 1                                                           |                         |             | 1                       | n/a         |
| STAT 2                                                           |                         |             | 2.59 (1.50,4.48)        | 0.0007      |
| STAT 3                                                           |                         |             | 5.05 (2.70,9.46)        | <.0001      |
| STAT 4/5                                                         |                         |             | 9.98 (5.91,16.86)       | <.0001      |
| Preoperative mechanical circulatory support                      |                         |             | 1.24 (0.62,2.48)        | 0.55        |
| Preoperative persistent shock                                    |                         |             | 1.93 (0.82,4.57)        | 0.13        |
| Preoperative mechanical ventilation                              |                         |             | 5.25 (2.95,9.35)        | <0.0001     |
| Preoperative renal failure or need for dialysis                  |                         |             | 2.02 (1.10,3.72)        | 0.02        |
| Preoperative neurological deficit/stroke/intracranial hemorrhage |                         |             | 2.14 (1.25,3.68)        | 0.006       |
| Preoperative diabetes mellitus                                   |                         |             | 1.57 (0.57,4.32)        | 0.39        |
| Any other preoperative factor                                    |                         |             | 1.94 (1.39,2.70)        | <0.0001     |
